# Supplementary material for: Initial results of coring at Prees, Cheshire Basin, UK (ICDP JET project): towards an integrated stratigraphy, timescale, and Earth system understanding for the Early Jurassic
Source: Copernicus journal article supplement (doi:10.5194/sd-32-1-2023), 2023-10-26
Supplement: Supplementary file 1 [file sd-32-1-2023-supplement.zip]

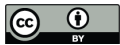

## *Supplement of*

# **Initial results of coring at Prees, Cheshire Basin, UK (ICDP JET project): towards an integrated stratigraphy, timescale, and Earth system understanding for the Early Jurassic**

**Stephen P. Hesselbo et al.**

*Correspondence to:* Stephen P. Hesselbo ([s.p.hesselbo@exeter.ac.uk](mailto:s.p.hesselbo@exeter.ac.uk)) and Clemens V. Ullmann ([c.ullmann@exeter.ac.uk](mailto:c.ullmann@exeter.ac.uk))

- sd-32-1-2023-supplement-title-page.pdf
- Supplementary Data File 1 [Prees Depth Model].xlsx
- Supplementary Data File 2 [Prees Bio].xlsx
- Supplementary Data File 3 [Mochras Bio].xlsx
- Supplementary Data File 4 [d13Corg].xlsx
- Supplementary Data File 5 [p-XRF].xlsx
- Supplementary Data File 6 [GS-IRMS].xlsx
- Supplementary Data File 7 [pyrolysis].xlsx
- Supplementary Data File 8 [vector graphics]
  - Figure 3 [Prees Graphic Log Revised].svg
  - Figure 4 [Prees summary core data].svg
  - Figure 5 [Prees summary log data].svg

The copyright of individual parts of the supplement might differ from the article licence.
